# Supplementary material for: Genome-wide meta-analysis identifies five new susceptibility loci for pancreatic cancer
Source: PubMed Central journal article supplement (PMC5805680; doi:10.1038/s41467-018-02942-5), 2018-02-08
Supplement: 41467_2018_2942_MOESM1_ESM.pdf [file 41467_2018_2942_MOESM1_ESM.pdf]

**Supplementary Table 1.** Overview of study samples and genotyping platforms.

| Dataset                 | Sample Size   |               | Genotyping Platform                              | GWAS        | Stage |
|-------------------------|---------------|---------------|--------------------------------------------------|-------------|-------|
|                         | Case          | Control       |                                                  |             |       |
| <b>PanScan I and II</b> | <b>3,525</b>  | <b>3,642</b>  | Illumina HumanHap550 Infinium II, Human 610-Quad | STAGE I     |       |
| Female                  | 1,684         | 1,757         |                                                  |             |       |
| Male                    | 1,841         | 1,885         |                                                  |             |       |
| Cohort Studies          | 1,394         | 1,459         |                                                  |             |       |
| Case-Control studies    | 2,131         | 2,183         |                                                  |             |       |
| <b>PanScan III</b>      | <b>1,582</b>  | <b>5,203</b>  | OmniExpress, Omni1M, Omni2.5 and Omni5M          | STAGE I     |       |
| Female                  | 801           | 1,337         |                                                  |             |       |
| Male                    | 781           | 3,866         |                                                  |             |       |
| Cohort Studies          | 939           | 4,758         |                                                  |             |       |
| Case-Control studies    | 643           | 445           |                                                  |             |       |
| <b>PanC4</b>            | <b>3,933</b>  | <b>3,651</b>  | Illumina OmniExpressExome                        | STAGE I     |       |
| Female                  | 1,653         | 1,613         |                                                  |             |       |
| Male                    | 2,280         | 2,038         |                                                  |             |       |
| Cohort Studies          | 0             | 0             |                                                  |             |       |
| Case-Control studies    | 3,933         | 3,651         |                                                  |             |       |
| <b>PANDoRA</b>          | <b>2,737</b>  | <b>4,752</b>  | TaqMan                                           | Replication |       |
| Female                  | 1,197         | 2,157         |                                                  |             |       |
| Male                    | 1,522         | 2,523         |                                                  |             |       |
| Missing gender          | 18            | 72            |                                                  |             |       |
| Cohort Studies          | 0             | 0             |                                                  |             |       |
| Case-Control studies    | 2,737         | 4,752         |                                                  |             |       |
| TOTAL Cohort            | 2,333         | 6,217         |                                                  |             |       |
| TOTAL Case-control      | 9,444         | 11,031        |                                                  |             |       |
| <b>TOTAL</b>            | <b>11,777</b> | <b>17,248</b> |                                                  |             |       |

Cases and control subjects included in the final analysis are listed. Genotype quality control is detailed in the Materials and Methods section.

**Supplementary Table 2: Previously Reported Pancreatic Cancer Susceptibility Loci**

| Chr <sup>a</sup><br>SNP<br>Position <sup>b</sup><br>Gene     | Effect<br>Allele<br>(Minor)/<br>Reference<br>Allele | Statistic                          | PANSCAN I&II           | PANSCAN III           | PANC4                 | All GWAS               | PANDoRA               | GWAS +<br>PANDORA      |
|--------------------------------------------------------------|-----------------------------------------------------|------------------------------------|------------------------|-----------------------|-----------------------|------------------------|-----------------------|------------------------|
| 1q32.1<br>rs2816938<br>199,985,368<br><i>NR5A2</i>           | A/T                                                 | Maf <sup>c</sup><br>cases;controls | 0.25; 0.22             | 0.25; 0.23            | 0.27; 0.23            |                        |                       |                        |
|                                                              |                                                     | Info <sup>d</sup>                  | 1                      | 1                     | 1                     |                        |                       |                        |
|                                                              |                                                     | OR(CI)                             | 1.25(1.17-1.33)        | 1.19(1.08 -1.30)      | 1.19(1.12 -1.27)      | 1.21(1.17-1.26)        |                       |                        |
|                                                              |                                                     | p-value                            | 1.81x10 <sup>-8</sup>  | 2.33x10 <sup>-3</sup> | 2.80x10 <sup>-6</sup> | 3.36x10 <sup>-15</sup> |                       |                        |
|                                                              |                                                     | Heterogeneity <sup>e</sup>         |                        |                       |                       | 6.48x10 <sup>-1</sup>  |                       |                        |
| 1q32.1<br>rs3790844<br>200,007,432<br><i>NR5A2</i>           | G/A                                                 | maf<br>cases;controls              | 0.20; 0.24             | 0.20; 0.24            | 0.20; 0.23            |                        |                       |                        |
|                                                              |                                                     | info                               | g                      | g                     | g                     |                        |                       |                        |
|                                                              |                                                     | OR(CI)                             | 0.77(0.70-0.85)        | 0.86(0.74-0.97)       | 0.83(0.76 -0.91)      | 0.81(0.76-0.86)        |                       |                        |
|                                                              |                                                     | p-value                            | 2.16x10 <sup>-10</sup> | 7.62x10 <sup>-3</sup> | 6.87x10 <sup>-6</sup> | 7.62x10 <sup>-16</sup> |                       |                        |
|                                                              |                                                     | heterogeneity                      |                        |                       |                       | 2.60x10 <sup>-1</sup>  |                       |                        |
| 2p13.3<br>rs1486134<br>67,639,769<br><i>ETAA1(2236bp 3')</i> | G/T                                                 | maf<br>cases;controls              | 0.30; 0.28             | 0.29; 0.28            | 0.30; 0.28            |                        | 0.29; 0.27            |                        |
|                                                              |                                                     | info                               | g                      | g                     | g                     |                        | g                     |                        |
|                                                              |                                                     | OR(CI)                             | 1.10(1.03-1.17)        | 1.11(1.00 -1.21)      | 1.14(1.07 -1.21)      | 1.12(1.07-1.16)        | 1.16(1.06-1.27)       | 1.13(1.09-1.17)        |
|                                                              |                                                     | p-value                            | 8.04x10 <sup>-3</sup>  | 5.90x10 <sup>-2</sup> | 1.88x10 <sup>-4</sup> | 9.80x10 <sup>-7</sup>  | 9.42x10 <sup>-4</sup> | 4.61x10 <sup>-9</sup>  |
|                                                              |                                                     | heterogeneity                      |                        |                       |                       | 7.53x10 <sup>-1</sup>  | 3.32x10 <sup>-2</sup> | 1.04x10 <sup>-1</sup>  |
| 3q29<br>rs9854771<br>189,508,471<br><i>TP63</i>              | A/G                                                 | maf<br>cases;controls              | 0.34; 0.37             | 0.34; 0.36            | 0.33; 0.36            |                        | 0.34; 0.36            |                        |
|                                                              |                                                     | info                               | 1                      | g                     | 1                     |                        |                       |                        |
|                                                              |                                                     | OR(CI)                             | 0.87(0.81-0.93)        | 0.96(0.87 -1.06)      | 0.88(0.82 -0.94)      | 0.89(0.85-0.93)        | 0.93(0.86-1.01)       | 0.90(0.86-0.94)        |
|                                                              |                                                     | p-value                            | 7.98x10 <sup>-5</sup>  | 4.00x10 <sup>-1</sup> | 1.28x10 <sup>-4</sup> | 1.14x10 <sup>-7</sup>  | 1.01x10 <sup>-1</sup> | 4.54x10 <sup>-8</sup>  |
|                                                              |                                                     | heterogeneity                      |                        |                       |                       | 2.44x10 <sup>-1</sup>  | 8.15x10 <sup>-1</sup> | 6.50x10 <sup>-1</sup>  |
| 5p15.33<br>rs2736098<br>1,294,086<br><i>TERT</i>             | T/C                                                 | maf<br>cases;controls              | 0.26; 0.28             | 0.22; 0.27            | 0.24 0.27             |                        | 0.22; 0.20            |                        |
|                                                              |                                                     | info                               | 0.84                   | g                     | 0.92                  |                        | g                     |                        |
|                                                              |                                                     | OR(CI)                             | 0.85(0.77-0.93)        | 0.78(0.67-0.89)       | 0.83(0.75 -0.91)      | 0.83(0.78-0.88)        | 0.89(0.79-0.99)       | 0.84(0.79-0.88)        |
|                                                              |                                                     | p-value                            | 6.11x10 <sup>-5</sup>  | 1.28x10 <sup>-5</sup> | 1.95x10 <sup>-6</sup> | 5.80x10 <sup>-14</sup> | 1.68x10 <sup>-2</sup> | 6.86x10 <sup>-15</sup> |
|                                                              |                                                     | heterogeneity                      |                        |                       |                       | 5.19x10 <sup>-1</sup>  |                       | 4.18x10 <sup>-1</sup>  |
| 5p15.33<br>rs35226131                                        | T/C                                                 | maf<br>cases;controls              | 0.02; 0.03             | 0.02; 0.03            | 0.02; 0.03            |                        |                       |                        |

|                                                        |     |                    |                       |                       |                       |                        |                       |                        |
|--------------------------------------------------------|-----|--------------------|-----------------------|-----------------------|-----------------------|------------------------|-----------------------|------------------------|
| 1,295,373<br><i>TERT, CLPTM1L</i>                      |     | info               | 0.77                  | 0.84                  | 0.98                  |                        |                       |                        |
|                                                        |     | OR(CI)             | 0.61(0.35-0.87)       | 0.66(0.35 -0.97)      | 0.71(0.51 -0.91)      | 0.67(0.53-0.81)        |                       |                        |
|                                                        |     | p-value            | 2.15x10 <sup>-4</sup> | 9.05x10 <sup>-3</sup> | 6.82x10 <sup>-4</sup> | 2.19x10 <sup>-8</sup>  |                       |                        |
|                                                        |     | heterogeneity      |                       |                       |                       | 6.95x10 <sup>-1</sup>  |                       |                        |
| 5p15.33<br>rs401681<br>1,322,087<br><i>CLPTM1L</i>     | T/C | maf cases;controls | 0.49; 0.45            | 0.49; 0.45            | 0.49; 0.44            |                        |                       |                        |
|                                                        |     | info               | g                     | 0.996                 | g                     |                        |                       |                        |
|                                                        |     | OR(CI)             | 1.19(1.12-1.25)       | 1.20(1.11 -1.30)      | 1.19(1.13 -1.25)      | 1.19(1.15-1.23)        |                       |                        |
|                                                        |     | p-value            | 3.53x10 <sup>-7</sup> | 1.27x10 <sup>-4</sup> | 9.15x10 <sup>-8</sup> | 9.32x10 <sup>-17</sup> |                       |                        |
|                                                        |     | heterogeneity      |                       |                       |                       | 9.73x10 <sup>-1</sup>  |                       |                        |
| 7p13<br>rs17688601<br>40,866,663<br><i>SUGCT</i>       | A/C | maf cases;controls | 0.24; 0.27            | 0.25; 0.27            | 0.25; 0.27            |                        | 0.25; 0.28            |                        |
|                                                        |     | info               | g                     | g                     | g                     |                        | g                     |                        |
|                                                        |     | OR(CI)             | 0.85(0.78-0.92)       | 0.92(0.81-1.02)       | 0.88(0.82-0.95)       | 0.88(0.83-0.93)        | 0.91(0.83-1)          | 0.88(0.84-0.93)        |
|                                                        |     | p-value            | 4.14x10 <sup>-5</sup> | 1.14x10 <sup>-1</sup> | 1.13x10 <sup>-3</sup> | 8.23x10 <sup>-8</sup>  | 3.93x10 <sup>-2</sup> | 1.11x10 <sup>-8</sup>  |
|                                                        |     | heterogeneity      |                       |                       |                       | 5.63x10 <sup>-1</sup>  | 7.25x10 <sup>-2</sup> | 1.70x10 <sup>-1</sup>  |
| 7q32.3<br>rs6971499<br>130,680,521<br><i>LINC-PINT</i> | C/T | maf cases;controls | 0.12;0.14             | 0.13; 0.16            | 0.13; 0.16            |                        | 0.12; 0.15            |                        |
|                                                        |     | info               | 0.95                  | g                     | g                     |                        |                       |                        |
|                                                        |     | OR(CI)             | 0.83(0.73-0.92)       | 0.79(0.66 -0.93)      | 0.82(0.73 -0.91)      | 0.82(0.76-0.88)        | 0.80(0.67-0.92)       | 0.81(0.76-0.87)        |
|                                                        |     | p-value            | 1.52x10 <sup>-4</sup> | 7.12x10 <sup>-4</sup> | 2.32x10 <sup>-5</sup> | 4.32x10 <sup>-11</sup> | 3.82x10 <sup>-4</sup> | 7.41x10 <sup>-14</sup> |
|                                                        |     | heterogeneity      |                       |                       |                       | 8.79x10 <sup>-1</sup>  |                       | 9.43x10 <sup>-1</sup>  |
| 8q24.21<br>rs10094872<br>128,719,884<br><i>MYC</i>     | T/A | maf cases;controls | 0.40; 0.36            | 0.39; 0.36            | 0.38; 0.36            |                        |                       |                        |
|                                                        |     | info               | 0.94                  | 0.96                  | 0.97                  |                        |                       |                        |
|                                                        |     | OR(CI)             | 1.17(1.10-1.24)       | 1.18(1.08 -1.28)      | 1.11(1.04 -1.18)      | 1.14(1.10-1.19)        |                       |                        |
|                                                        |     | p-value            | 1.28x10 <sup>-5</sup> | 9.83x10 <sup>-4</sup> | 3.25x10 <sup>-3</sup> | 1.19x10 <sup>-9</sup>  |                       |                        |
|                                                        |     | heterogeneity      |                       |                       |                       | 4.55x10 <sup>-1</sup>  |                       |                        |
| 8q24.21<br>rs1561927<br>129,568,078<br><i>MIR1208</i>  | C/T | maf cases;controls | 0.25; 0.28            | 0.25; 0.27            | 0.24; 0.26            |                        | 0.26; 0.28            |                        |
|                                                        |     | info               | g                     | g                     | g                     |                        | g                     |                        |
|                                                        |     | OR(CI)             | 0.86(0.79-0.94)       | 0.87(0.76 -0.98)      | 0.92(0.84 -0.99)      | 0.89(0.84-0.93)        | 0.91(0.81-0.99)       | 0.89(0.85-0.93)        |
|                                                        |     | p-value            | 1.06x10 <sup>-4</sup> | 1.06x10 <sup>-2</sup> | 2.74x10 <sup>-2</sup> | 6.18x10 <sup>-7</sup>  | 3.69x10 <sup>-2</sup> | 7.09x10 <sup>-8</sup>  |
|                                                        |     | heterogeneity      |                       |                       |                       | 4.54x10 <sup>-1</sup>  |                       | 6.25x10 <sup>-1</sup>  |
| 9q34<br>rs505922                                       | C/T | maf cases;controls | 0.39; 0.35            | 0.41; 0.35            | 0.40; 0.35            |                        |                       |                        |
|                                                        |     | info               | 1                     | 1                     | g                     |                        |                       |                        |

|                                                             |     |                    |                        |                        |                        |                        |                       |                        |
|-------------------------------------------------------------|-----|--------------------|------------------------|------------------------|------------------------|------------------------|-----------------------|------------------------|
| 136,149,229<br><i>ABO</i>                                   |     | OR(CI)             | 1.21(1.14-1.28)        | 1.37(1.27 -1.48)       | 1.28(1.21 -1.34)       | 1.27(1.22-1.31)        |                       |                        |
|                                                             |     | p-value            | 4.78x10 <sup>-8</sup>  | 4.56x10 <sup>-10</sup> | 1.00x10 <sup>-12</sup> | 7.35x10 <sup>-27</sup> |                       |                        |
|                                                             |     | heterogeneity      |                        |                        |                        | 1.13x10 <sup>-1</sup>  |                       |                        |
| 13q12.2<br>rs9581943<br>28,493,997<br><i>PDX1-AS1-PDX1</i>  | A/G | maf cases;controls | 0.43;0.41              | 0.44; 0.40             | 0.43; 0.39             |                        | 0.44; 0.41            |                        |
|                                                             |     | info               | 1                      | g                      | g                      |                        |                       |                        |
|                                                             |     | OR(CI)             | 1.12(1.06-1.19)        | 1.22(1.13 -1.32)       | 1.17(1.11 -1.24)       | 1.16(1.12-1.21)        | 1.12(1.03-1.20)       | 1.15(1.12-1.19)        |
|                                                             |     | p-value            | 6.31x10 <sup>-4</sup>  | 3.10x10 <sup>-5</sup>  | 1.17x10 <sup>-6</sup>  | 1.21x10 <sup>-12</sup> | 8.82x10 <sup>-3</sup> | 5.12x10 <sup>-14</sup> |
|                                                             |     | heterogeneity      |                        |                        |                        | 3.37x10 <sup>-1</sup>  |                       | 4.19x10 <sup>-1</sup>  |
| 13q22.1<br>rs9543325<br>73,916,628<br><i>KLF5 and KLF12</i> | C/T | maf cases;controls | 0.44; 0.37             | 0.43; 0.38             | 0.43; 0.37             |                        |                       |                        |
|                                                             |     | info               | g                      | g                      | g                      |                        |                       |                        |
|                                                             |     | OR(CI)             | 1.26(1.19 -1.33)       | 1.19(1.09 -1.28)       | 1.24(1.17 -1.30)       | 1.24(1.19-1.28)        |                       |                        |
|                                                             |     | p-value            | 2.87x10 <sup>-11</sup> | 5.10x10 <sup>-4</sup>  | 1.91x10 <sup>-10</sup> | 1.22x10 <sup>-22</sup> |                       |                        |
|                                                             |     | heterogeneity      |                        |                        |                        | 6.04x10 <sup>-1</sup>  |                       |                        |
| 16q23.1<br>rs7190458<br>75,263,661<br><i>BCAR1</i>          | A/G | maf cases;controls | 0.06; 0.05             | 0.06; 0.04             | 0.06; 0.04             |                        | 0.05; 0.04            |                        |
|                                                             |     | info               | 0.74                   | g                      | g                      |                        |                       |                        |
|                                                             |     | OR(CI)             | 1.33(1.16-1.50)        | 1.65(1.43 -1.86)       | 1.27(1.12 -1.41)       | 1.36(1.26 -1.46)       | 1.34(1.13-1.54)       | 1.36(1.27-1.44)        |
|                                                             |     | p-value            | 9.38x10 <sup>-4</sup>  | 4.69x10 <sup>-6</sup>  | 1.39x10 <sup>-3</sup>  | 7.09x10 <sup>-10</sup> | 5.07x10 <sup>-3</sup> | 1.29x10 <sup>-11</sup> |
|                                                             |     | heterogeneity      |                        |                        |                        | 1.27x10 <sup>-1</sup>  |                       | 2.46x10 <sup>-1</sup>  |
| 17q25.1<br>rs7214041<br>70,401,476<br><i>LINC00673</i>      | T/C | maf cases;controls | 0.13; 0.12             | 0.13; 0.11             | 0.14; 0.11             |                        | 0.14; 0.12            |                        |
|                                                             |     | info               | 0.96                   | g                      | g                      |                        |                       |                        |
|                                                             |     | OR(CI)             | 1.16(1.05-1.28)        | 1.27(1.10 -1.47)       | 1.32(1.20 -1.46)       | 1.25(1.18-1.31)        | 1.25(1.11-1.41)       | 1.25(1.19-1.30)        |
|                                                             |     | p-value            | 4.04x10 <sup>-3</sup>  | 1.39x10 <sup>-3</sup>  | 1.29x10 <sup>-8</sup>  | 6.58x10 <sup>-12</sup> | 3.37x10 <sup>-4</sup> | 9.49x10 <sup>-15</sup> |
|                                                             |     | heterogeneity      |                        |                        |                        | 1.59x10 <sup>-1</sup>  | 3.69x10 <sup>-1</sup> | 3.36x10 <sup>-1</sup>  |
| 22q12.1<br>rs16986825<br>29,300,306<br><i>ZNRF3</i>         | T/C | maf cases;controls | 0.17; 0.15             | 0.18; 0.15             | 0.17; 0.15             |                        | 0.20; 0.18            |                        |
|                                                             |     | info               | 1                      | g                      | g                      |                        |                       |                        |
|                                                             |     | OR(CI)             | 1.16(1.07-1.25)        | 1.22(1.09 -1.35)       | 1.13(1.04 -1.22)       | 1.16(1.10-1.21)        | 1.14(1.04-1.25)       | 1.15(1.10 -1.20)       |
|                                                             |     | p-value            | 1.61x10 <sup>-3</sup>  | 2.02x10 <sup>-3</sup>  | 5.24x10 <sup>-3</sup>  | 2.93x10 <sup>-7</sup>  | 1.27x10 <sup>-2</sup> | 1.21x10 <sup>-8</sup>  |
|                                                             |     | heterogeneity      |                        |                        |                        | 6.13x10 <sup>-1</sup>  |                       | 7.97x10 <sup>-1</sup>  |

a. Cytogenetic regions according to NCBI Human Genome Build 37

b. SNP position according to NCBI Human Genome Build 37

c. Minor allele frequency

d. Quality of imputation metric. See online methods for more detail. If a SNP is genotyped and not imputed, a 'g' is reported

e. P-value from test of heterogeneity

**Supplementary Table 3:** Additional Suggestive Pancreatic Cancer Susceptibility Loci

| Chr <sup>a</sup><br>SNP<br>Position <sup>b</sup><br>Gene                   | Effect<br>Allele<br>(Minor)/<br>Referenc<br>e Allele | Statistic             | PANSCAN I&II          | PANSCAN III           | PANC4                 | All GWAS <sup>c</sup> | PANDoRA               | GWAS +<br>PANDORA <sup>d</sup> |
|----------------------------------------------------------------------------|------------------------------------------------------|-----------------------|-----------------------|-----------------------|-----------------------|-----------------------|-----------------------|--------------------------------|
| 1p13.1<br>rs351365<br>113046395<br><i>WNT2B</i>                            | T/C                                                  | maf<br>cases;controls | 0.24; 0.25            | 0.23; 0.25            | 0.23; 0.26            |                       | 0.23; 0.25            |                                |
|                                                                            |                                                      | info                  | 0.91                  | g                     | g                     |                       | g                     |                                |
|                                                                            |                                                      | OR (CI)               | 0.93 (0.83 -1.21)     | 0.94 (0.81 -1.01)     | 0.86 (0.79 -0.94)     | 0.90 (0.85 -0.95)     | 0.92 (0.83 -1.01)     | 0.90 (0.86 - 0.95)             |
|                                                                            |                                                      | p-value               | 6.66x10 <sup>-2</sup> | 2.39x10 <sup>-1</sup> | 1.11x10 <sup>-4</sup> | 3.00x10 <sup>-5</sup> | 8.02x10 <sup>-2</sup> | 6.32x10 <sup>-6</sup>          |
|                                                                            |                                                      | heterogeneity         |                       |                       |                       | 3.21x10 <sup>-1</sup> | 3.97x10 <sup>-1</sup> | 4.81x10 <sup>-1</sup>          |
| 9q31.3<br>rs10991043<br>106797388<br><i>SMC2</i><br>(59153bp on 5')        | C/T                                                  | maf<br>cases;controls | 0.38; 0.37            | 0.39; 0.37            | 0.40; 0.36            |                       | 0.36; 0.36            |                                |
|                                                                            |                                                      | info                  | g                     | g                     | g                     |                       | g                     |                                |
|                                                                            |                                                      | OR (CI)               | 1.08 (1.01 -1.15)     | 1.02 (0.93 -1.13)     | 1.20 (1.13 -1.29)     | 1.12 (1.07-1.16)      | 1 (0.92 - 1.08)       | 1.09 (1.05 - 1.13)             |
|                                                                            |                                                      | p-value               | 3.33x10 <sup>-2</sup> | 6.64x10 <sup>-1</sup> | 3.08x10 <sup>-8</sup> | 3.53x10 <sup>-7</sup> | 9.19x10 <sup>-1</sup> | 6.97x10 <sup>-6</sup>          |
|                                                                            |                                                      | heterogeneity         |                       |                       |                       | 8.91x10 <sup>-3</sup> | 3.02x10 <sup>-1</sup> | 6.57x10 <sup>-3</sup>          |
| 12q24.31<br>rs1182933<br>121,454,622<br><i>HNF1A</i>                       | T/C                                                  | maf<br>cases;controls | 0.33; 0.30            | 0.31; 0.30            | 0.32; 0.30            |                       | 0.35; 0.33            |                                |
|                                                                            |                                                      | info                  | 0.99                  | g                     | g                     |                       | g                     |                                |
|                                                                            |                                                      | OR (CI)               | 1.15 (1.08 -<br>1.22) | 1.09 (0.98-1.19)      | 1.08 (1.01-1.15)      | 1.11(1.06-1.15)       | 1.12 (1.03 -<br>1.20) | 1.11 (1.07 - 1.15)             |
|                                                                            |                                                      | p-value               | 1.23x10 <sup>-4</sup> | 1.15x10 <sup>-1</sup> | 3.97x10 <sup>-2</sup> | 9.54x10 <sup>-6</sup> | 1.15x10 <sup>-2</sup> | 3.49x10 <sup>-7</sup>          |
|                                                                            |                                                      | heterogeneity         |                       |                       |                       | 3.94x10 <sup>-1</sup> |                       | 5.95x10 <sup>-1</sup>          |
| 20q13.11<br>rs6073450<br>43086648<br><i>PKIG/HNF4A</i><br>(73788 bp on 5') | A/G                                                  | maf<br>cases;controls | 0.40; 0.38            | 0.39; 0.38            | 0.40; 0.37            |                       | 0.41; 0.40            |                                |
|                                                                            |                                                      | info                  | g                     | g                     | g                     |                       | g                     |                                |
|                                                                            |                                                      | OR (CI)               | 1.08 (1.01 -1.16)     | 1.05 (0.95 -1.15)     | 1.13 (1.05 -1.21)     | 1.09 (1.05-1.14)      | 1.09 (1- 1.18)        | 1.09 (1.05 - 1.13)             |
|                                                                            |                                                      | p-value               | 1.90x10 <sup>-2</sup> | 3.53x10 <sup>-1</sup> | 4.07x10 <sup>-4</sup> | 3.40x10 <sup>-5</sup> | 4.92x10 <sup>-2</sup> | 4.55x10 <sup>-6</sup>          |
|                                                                            |                                                      | heterogeneity         |                       |                       |                       | 4.32x10 <sup>-1</sup> | 9.03x10 <sup>-1</sup> | 9.14x10 <sup>-1</sup>          |

a. Cytogenetic regions according to NCBI Human Genome Build 37

b. SNP position according to NCBI Human Genome Build 37

c. Minor allele frequency

d. Quality of imputation metric. See online methods for more detail. If snp is genotyped and not imputed, a 'g' is reported

e. P-value from test of heterogeneity of the Stage 1 studies (PanScan I & II, PanScan III and PanC4) and Stage2 (PanScan I & II, PanScan III, PanC4 and PANDoRA)

**Supplementary Table 4:** Additional Loci selected for replication genotyping in the PANDORA population ( $P < 1 \times 10^{-6}$ )

| Chr <sup>a</sup><br>SNP<br>Position <sup>b</sup><br>Gene              | Effect Allele<br>(Minor)/<br>Reference<br>Allele | Statistic                             | PANSCAN I/II<br>3,525 cases<br>3,642 controls | PANSCAN III<br>1,582 cases<br>5,203 controls | PANC4<br>3,933 cases<br>3,651 Controls | ALL GWAS<br>9,040 cases<br>12,496 controls | PANDoRA<br>2,737 cases<br>4,752 controls | GWAS + PANDoRa<br>11,777 cases<br>17,248 controls |
|-----------------------------------------------------------------------|--------------------------------------------------|---------------------------------------|-----------------------------------------------|----------------------------------------------|----------------------------------------|--------------------------------------------|------------------------------------------|---------------------------------------------------|
| 2q24.1<br>rs12478462<br>153,654,720<br><i>ARL6IP6</i>                 | G/T                                              | maf <sup>c</sup><br>cases;controls    | 0.25; 0.23                                    | 0.26; 0.24                                   | 0.24; 0.22                             |                                            | 0.23; 0.24                               |                                                   |
|                                                                       |                                                  | info <sup>d</sup>                     | 1.0                                           | g                                            | g                                      |                                            | g                                        |                                                   |
|                                                                       |                                                  | OR (CI)                               | 1.11 (1.03-1.20)                              | 1.19 (1.07-1.33)                             | 1.14(1.05-1.23)                        | 1.14 (1.08-1.19)                           | 0.98 (0.89- 1.07)                        | 1.10 (1.05-1.14)                                  |
|                                                                       |                                                  | p-value                               | 9.52x10 <sup>-3</sup>                         | 1.80x10 <sup>-3</sup>                        | 9.89x10 <sup>-4</sup>                  | 3.03x10 <sup>-7</sup>                      | 5.91x10 <sup>-1</sup>                    | 2.04x10 <sup>-5</sup>                             |
|                                                                       |                                                  | Heterogeneity<br>p-value <sup>e</sup> |                                               |                                              |                                        | 5.83x10 <sup>-1</sup>                      |                                          | 2.39x10 <sup>-2</sup>                             |
| 4q31.21<br>rs6537481<br>148,396,094<br><i>EDNRA</i>                   | G/A                                              | maf<br>cases;controls                 | 0.23; 0.24                                    | 0.24; 0.25                                   | 0.23; 0.25                             |                                            | 0.26; 0.26                               |                                                   |
|                                                                       |                                                  | info                                  | 0.99                                          | 0.97                                         | 0.97                                   | -                                          | g                                        |                                                   |
|                                                                       |                                                  | OR (CI)                               | 0.89 (0.83 -0.97)                             | 0.88 (0.79-0.98)                             | 0.86 (0.79-0.92)                       | 0.88 (0.83 -0.92)                          | 1.01 (0.92-1.10)                         | 0.90(0.87-0.94)                                   |
|                                                                       |                                                  | p-value                               | 5.15x10 <sup>-3</sup>                         | 2.54x10 <sup>-2</sup>                        | 6.69x10 <sup>-5</sup>                  | 1.15x10 <sup>-7</sup>                      | 9.12x10 <sup>-1</sup>                    | 3.81x10 <sup>-6</sup>                             |
|                                                                       |                                                  | Heterogeneity<br>p-value              |                                               |                                              |                                        | 7.37x10 <sup>-1</sup>                      |                                          | 6.10x10 <sup>-2</sup>                             |
| 9q31.3<br>rs2417487<br>106,887,581<br><i>SMC2</i>                     | A/G                                              | maf<br>cases;controls                 | 0.46; 0.43                                    | 0.46; 0.44                                   | 0.47; 0.44                             |                                            | 0.45; 0.43                               |                                                   |
|                                                                       |                                                  | info                                  | 0.99                                          | 0.99                                         | 0.99                                   |                                            | g                                        |                                                   |
|                                                                       |                                                  | OR (CI)                               | 1.10 (1.04 – 1.21)                            | 1.05 (0.95 – 1.13)                           | 1.14 (1.08-1.19)                       | 1.11 (1.07-1.15)                           | 1.03 (0.96-1.10)                         | 1.09 (1.05-1.12)                                  |
|                                                                       |                                                  | p-value                               | 2.04x10 <sup>-3</sup>                         | 3.43x10 <sup>-1</sup>                        | 6.72x10 <sup>-6</sup>                  | 1.49x10 <sup>-7</sup>                      | 3.79x10 <sup>-1</sup>                    | 5.70x10 <sup>-7</sup>                             |
|                                                                       |                                                  | Heterogeneity<br>p-value              |                                               |                                              |                                        | 2.15x10 <sup>-1</sup>                      |                                          | 9.19x10 <sup>-2</sup>                             |
| 16q24.1<br>rs7200646<br>86,335,351<br><i>LINC01081/<br/>LINC00917</i> | C/T                                              | maf<br>cases;controls                 | 0.37:0.34                                     | 0.36:0.34                                    | 0.36:0.34                              |                                            | 0.35:0.35                                |                                                   |
|                                                                       |                                                  | info                                  | g                                             | g                                            | g                                      |                                            | g                                        |                                                   |
|                                                                       |                                                  | OR (CI)                               | 1.13 (1.06-1.20)                              | 1.14(1.04-1.24)                              | 1.11 (1.04-1.18)                       | 1.12 (1.07-1.17)                           | 1 (0.92-1.08)                            | 1.09 (1.05 – 1.13)                                |
|                                                                       |                                                  | p-value                               | 6.32x10 <sup>-4</sup>                         | 9.64x10 <sup>-3</sup>                        | 2.02x10 <sup>-3</sup>                  | 1.39x10 <sup>-7</sup>                      | 9.31x10 <sup>-1</sup>                    | 4.21x10 <sup>-6</sup>                             |
|                                                                       |                                                  | Heterogeneity<br>p-value              |                                               |                                              |                                        | 9.14x10 <sup>-1</sup>                      |                                          | 8.01x10 <sup>-2</sup>                             |
| 17q21.1<br>rs77038344<br>38,644,214<br><i>IGFBP4/TNS4</i>             | T/C                                              | maf<br>cases;controls                 | 0.09; 0.08                                    | 0.10; 0.08                                   | 0.09; 0.08                             |                                            | 0.09;0.10                                |                                                   |
|                                                                       |                                                  | info                                  | 0.89                                          | 0.95                                         | 0.97                                   | -                                          | g                                        |                                                   |
|                                                                       |                                                  | OR (CI)                               | 1.18 (1.04-1.34)                              | 1.30 (1.10 - 1.54)                           | 1.19 (1.06-1.34)                       | 1.17 (1.11 -1.24)                          | 0.92 (0.81-1.05)                         | 1.13 (1.06 - 1.19)                                |

|                                                 |     |                       |                       |                       |                       |                       |                       |                       |
|-------------------------------------------------|-----|-----------------------|-----------------------|-----------------------|-----------------------|-----------------------|-----------------------|-----------------------|
|                                                 |     | p-value               | $8.88 \times 10^{-3}$ | $2.48 \times 10^{-3}$ | $2.89 \times 10^{-3}$ | $9.50 \times 10^{-7}$ | $2.01 \times 10^{-1}$ | $3.73 \times 10^{-4}$ |
|                                                 |     | Heterogeneity p-value |                       |                       |                       | $6.52 \times 10^{-1}$ |                       | $3.11 \times 10^{-3}$ |
| 22q11.1<br>rs450960<br>1831630<br><i>MICAL3</i> | T/C | maf cases;controls    | 0.31; 0.29            | 0.33; 0.30            | 0.31; 0.30            |                       | 0.29; 0.30            |                       |
|                                                 |     | info                  | 1.0                   | 1.0                   | 1.0                   | -                     |                       |                       |
|                                                 |     | OR (CI)               | 1.10 (1.02-1.18)      | 1.27 (1.15 – 1.41)    | 1.08 (1.00-1.15)      | 1.11 (1.07 -1.15)     | 0.96 (0.89 -1.04)     | 1.08 (1.04-1.11)      |
|                                                 |     | p-value               | $1.11 \times 10^{-2}$ | $4.68 \times 10^{-6}$ | $3.75 \times 10^{-2}$ | $7.71 \times 10^{-7}$ | $3.47 \times 10^{-1}$ | $1.40 \times 10^{-4}$ |
|                                                 |     | Heterogeneity p-value |                       |                       |                       | $2.59 \times 10^{-2}$ |                       | $4.16 \times 10^{-4}$ |

a. Cytogenetic regions according to NCBI Human Genome Build 37

b. SNP position according to NCBI Human Genome Build 37

c. Minor allele frequency

d. Quality of imputation metric. See online methods for more detail. If snp is genotyped and not imputed, a 'g' is reported

e. P-value from test of heterogeneity

**Supplementary Table 5. Polygenic Risk Scores.**

| <b>PRS percentile</b> | <b>OR (95% CI)</b> | <b>P-value</b>         | <b>N</b> | <b># cases (%)</b> |
|-----------------------|--------------------|------------------------|----------|--------------------|
| <10%                  | 0.40 (0.38-0.55)   | $<2 \times 10^{-16}$   | 757      | 258 (34%)          |
| 10-20%                | 0.57 (0.47-0.68)   | $3.28 \times 10^{-10}$ | 756      | 294 (39%)          |
| 20-40%                | 0.78 (0.68-0.90)   | $7.27 \times 10^{-4}$  | 1513     | 708 (47%)          |
| 40-60%                | 1                  | -----                  | 1513     | 801 (53%)          |
| 60-80%                | 1.18 (1.02-1.36)   | $2.59 \times 10^{-2}$  | 1513     | 862 (57%)          |
| 80-90%                | 1.40 (1.17-1.67)   | $2.06 \times 10^{-4}$  | 757      | 463 (61%)          |
| >90%                  | 2.20 (1.83-2.65)   | $<2 \times 10^{-16}$   | 757      | 539 (71%)          |

Polygenic Risk Scores (PRS) were calculated in the PanC4 population.



**Supplementary Table 6. Association results for Chinese and Japanese pancreatic cancer risk loci in participants of European descent in PanScan I, II, III and PanC4**

| Chr      | GWAS study | SNP Position            | Genotype category <sup>a</sup> | Info <sup>b</sup>       | Reference allele | Effect allele | Subjects |       | Stage           | Effect allele frequency |        | Allelic OR <sup>c</sup> (95% CI) | P <sup>d</sup> | P <sub>het</sub> <sup>e</sup> |
|----------|------------|-------------------------|--------------------------------|-------------------------|------------------|---------------|----------|-------|-----------------|-------------------------|--------|----------------------------------|----------------|-------------------------------|
|          |            |                         |                                |                         |                  |               | Controls | Cases |                 | Controls                | Cases  |                                  |                |                               |
| 5p13.1   | Chinese    | rs2255280<br>39394989   | i<br>i<br>i                    | 0.776<br>0.782<br>0.796 | C                | A             | 3642     | 3525  | PanScan I+II    | 0.9946                  | 0.9935 | 0.77 (0.60-0.99)                 | 0.299          |                               |
|          |            |                         |                                |                         |                  |               | 5203     | 1582  | PanScan III     | 0.9930                  | 0.9935 | 1.16 (0.83-1.62)                 | 0.664          |                               |
|          |            |                         |                                |                         |                  |               | 3651     | 3933  | PanC4           | 0.9944                  | 0.9944 | 1.03 (0.81-1.32)                 | 0.905          |                               |
|          |            |                         |                                |                         |                  |               |          |       | <b>Combined</b> |                         |        | <b>1.06 (0.91-1.24)</b>          | <b>0.713</b>   |                               |
| 10q26.11 | Chinese    | rs12413624<br>120278944 | i<br>i<br>i                    | 1.000<br>0.999<br>0.998 | T                | A             | 3642     | 3525  | PanScan I+II    | 0.4386                  | 0.4330 | 0.98 (0.95-1.02)                 | 0.636          |                               |
|          |            |                         |                                |                         |                  |               | 5203     | 1582  | PanScan III     | 0.4369                  | 0.4283 | 0.93 (0.89-0.98)                 | 0.162          |                               |
|          |            |                         |                                |                         |                  |               | 3651     | 3933  | PanC4           | 0.4314                  | 0.4289 | 0.99 (0.96-1.03)                 | 0.833          |                               |
|          |            |                         |                                |                         |                  |               |          |       | <b>Combined</b> |                         |        | <b>0.98 (0.96-1.00)</b>          | <b>0.294</b>   |                               |
| 21q22.3  | Chinese    | rs1547374<br>43778895   | g<br>g<br>g                    | 1.000<br>1.000<br>1.000 | A                | G             | 3642     | 3525  | PanScan I+II    | 0.3118                  | 0.3128 | 1.00 (0.96-1.03)                 | 0.956          |                               |
|          |            |                         |                                |                         |                  |               | 5203     | 1582  | PanScan III     | 0.3133                  | 0.3404 | 1.14 (1.08-1.20)                 | 0.012          |                               |
|          |            |                         |                                |                         |                  |               | 3651     | 3933  | PanC4           | 0.3114                  | 0.3229 | 1.03 (1.00-1.07)                 | 0.363          |                               |
|          |            |                         |                                |                         |                  |               |          |       | <b>Combined</b> |                         |        | <b>1.04 (1.02-1.06)</b>          | <b>0.098</b>   |                               |
| 21q21.3  | Chinese    | rs372883<br>30717737    | i<br>i<br>g                    | 0.999<br>1.000<br>1.000 | T                | C             | 3642     | 3525  | PanScan I+II    | 0.4787                  | 0.4818 | 1.01 (0.98-1.05)                 | 0.714          |                               |
|          |            |                         |                                |                         |                  |               | 5203     | 1582  | PanScan III     | 0.4893                  | 0.4959 | 1.06 (1.01-1.11)                 | 0.241          |                               |
|          |            |                         |                                |                         |                  |               | 3651     | 3933  | PanC4           | 0.4984                  | 0.4830 | 0.94 (0.90-0.97)                 | 0.041          |                               |
|          |            |                         |                                |                         |                  |               |          |       | <b>Combined</b> |                         |        | <b>0.99 (0.97-1.01)</b>          | <b>0.568</b>   |                               |
| 22q13.32 | Chinese    | rs5768709<br>48929569   | i<br>i<br>i                    | 0.930<br>0.977<br>0.980 | A                | G             | 3642     | 3525  | PanScan I+II    | 0.3894                  | 0.3927 | 1.01 (0.97-1.04)                 | 0.842          |                               |
|          |            |                         |                                |                         |                  |               | 5203     | 1582  | PanScan III     | 0.4010                  | 0.4059 | 1.01 (0.96-1.06)                 | 0.839          |                               |
|          |            |                         |                                |                         |                  |               | 3651     | 3933  | PanC4           | 0.4031                  | 0.3909 | 0.94 (0.91-0.97)                 | 0.079          |                               |
|          |            |                         |                                |                         |                  |               |          |       | <b>Combined</b> |                         |        | <b>0.98 (0.96-1.00)</b>          | <b>0.356</b>   |                               |
| 6p25.3   | Japanese   | rs9502893<br>1340189    | g<br>g<br>g                    | 1.000<br>1.000<br>1.000 | C                | T             | 3642     | 3525  | PanScan I+II    | 0.5501                  | 0.5434 | 0.97 (0.94-1.00)                 | 0.392          |                               |
|          |            |                         |                                |                         |                  |               | 5203     | 1582  | PanScan III     | 0.5643                  | 0.5382 | 0.86 (0.82-0.91)                 | 0.002          |                               |
|          |            |                         |                                |                         |                  |               | 3651     | 3933  | PanC4           | 0.5592                  | 0.5493 | 0.96 (0.93-1.00)                 | 0.249          |                               |
|          |            |                         |                                |                         |                  |               |          |       | <b>Combined</b> |                         |        | <b>0.94 (0.92-0.97)</b>          | <b>0.009</b>   |                               |
| 7q36.2   | Japanese   | rs6464375<br>153625843  | g<br>i<br>g                    | 1.000<br>0.999<br>1.000 | C                | T             | 3642     | 3525  | PanScan I+II    | 0.0555                  | 0.0570 | 1.04 (0.97-1.12)                 | 0.582          |                               |
|          |            |                         |                                |                         |                  |               | 5203     | 1582  | PanScan III     | 0.0583                  | 0.0603 | 1.02 (0.92-1.13)                 | 0.864          |                               |
|          |            |                         |                                |                         |                  |               | 3651     | 3933  | PanC4           | 0.0594                  | 0.0600 | 1.01 (0.95-1.09)                 | 0.833          |                               |
|          |            |                         |                                |                         |                  |               |          |       | <b>Combined</b> |                         |        | <b>1.02 (0.98-1.07)</b>          | <b>0.580</b>   |                               |
| 12p11.21 | Japanese   | rs708224<br>32436409    | g<br>i<br>g                    | 1.000<br>0.998<br>1.000 | A                | G             | 3642     | 3525  | PanScan I+II    | 0.5927                  | 0.5767 | 0.93 (0.9-0.97)                  | 0.050          |                               |
|          |            |                         |                                |                         |                  |               | 5203     | 1582  | PanScan III     | 0.5761                  | 0.5644 | 0.93 (0.89-0.98)                 | 0.142          |                               |
|          |            |                         |                                |                         |                  |               | 3651     | 3933  | PanC4           | 0.5818                  | 0.5908 | 1.04 (1-1.07)                    | 0.261          |                               |
|          |            |                         |                                |                         |                  |               |          |       | <b>Combined</b> |                         |        | <b>0.98 (0.96-1.00)</b>          | <b>0.257</b>   |                               |

Results from unconditional logistic regression for SNPs marking published Chinese and Japanese pancreatic cancer susceptibility loci in participants of European descent from PanScan I-III and PanC4. A total of 9,040 pancreatic cancer patients and 12,496 control subjects with GWAS genotype and imputation data available were included. <sup>a</sup>Genotype category: g=genotyped, i=imputed. <sup>b</sup>Info: imputation information content/accuracy score. <sup>c</sup>For PanScan I+II, the analysis was adjusted for age, sex, study, arm and significant principal components; for PanScan III, the analysis was adjusted for age, sex, geographic region, and significant principal components; for PanC4, the analysis was adjusted for age, sex, study and significant principal components. <sup>d</sup>1 d.f. score test. <sup>e</sup>P value for test of heterogeneity. Chr: chromosome and band of reported locus.

**Supplemental Table 7.** DEPICT enrichment analysis showing tissues where genes from associated loci are highly expressed.

| MeSH first level term        | MeSH term               | MeSH second level term | <i>P</i> -value* |
|------------------------------|-------------------------|------------------------|------------------|
| Epithelial Cells             | A11.436                 | Cells                  | 5.06E-05         |
| Hepatocytes                  | A11.436.348             | Cells                  | 9.18E-05         |
| Gastrointestinal Tract       | A03.556                 | Digestive System       | 4.23E-04         |
| Intestines                   | A03.556.124             | Digestive System       | 6.56E-04         |
| Rectum                       | A03.556.124.526.767     | Digestive System       | 7.14E-04         |
| Lower Gastrointestinal Tract | A03.556.249             | Digestive System       | 9.99E-04         |
| Intestine Large              | A03.556.249.249         | Digestive System       | 1.06E-03         |
| Colon                        | A03.556.249.249.356     | Digestive System       | 1.12E-03         |
| Intestine Small              | A03.556.124.684         | Digestive System       | 3.00E-03         |
| Colon Sigmoid                | A03.556.249.249.356.668 | Digestive System       | 3.25E-03         |
| Cecum                        | A03.556.249.249.209     | Digestive System       | 3.65E-03         |
| Salivary Glands              | A03.556.500.760         | Digestive System       | 4.37E-03         |
| Ileum                        | A03.556.249.124         | Digestive System       | 4.77E-03         |
| Intestinal Mucosa            | A03.556.124.369         | Digestive System       | 4.81E-03         |
| Parotid Gland                | A03.556.500.760.464     | Digestive System       | 6.77E-03         |
| Upper Gastrointestinal Tract | A03.556.875             | Digestive System       | 7.10E-03         |
| Urinary Bladder              | A05.810.890             | Urogenital System      | 3.30E-03         |
| Cervix Uteri                 | A05.360.319.679.256     | Urogenital System      | 3.99E-03         |

DEPICT enrichment analysis was performed for GWAS significant pancreatic cancer risk loci from this publication and four other publications from pancreatic cancer GWAS in European populations (references 18-22). Shown are MeSH tissues where enrichment for pancreatic cancer risk loci was significant at FDR<0.05. The *P* value for the "pancreas" MESH term was 0.013 and was not significant after correction for multiple testing. Note that no genes or SNP-gene pairs were significant in DEPICT analysis at FDR<0.05 (data not shown). \*Nominal *P*-values for DEPICT analysis for associations with FDR<0.05. MeSH: Medical Subject Headings from PubMed.

**Supplementary Table 8.** Pathway enrichment analysis using KEGG, GO Molecular Function and GO Biological Process annotation.

| NGR  | TNGR  | NG | TNG | Hyp      | Hyp*     | Annotations                                                                                       |
|------|-------|----|-----|----------|----------|---------------------------------------------------------------------------------------------------|
| 24   | 34208 | 5  | 48  | 1.83E-10 | 5.48E-09 | (KEGG) 04950: Maturity onset diabetes of the young                                                |
| NGR  | TNGR  | NG | TNG | Hyp      | Hyp*     | Annotations                                                                                       |
| 898  | 34208 | 9  | 48  | 3.81E-06 | 3.12E-04 | GO:0003700: sequence-specific DNA binding transcription factor activity (MF)                      |
| 541  | 34208 | 7  | 48  | 1.00E-05 | 4.10E-04 | GO:0043565: sequence-specific DNA binding (MF)                                                    |
| 1785 | 34208 | 11 | 48  | 2.86E-05 | 7.81E-04 | GO:0003677: DNA binding (MF)                                                                      |
| 163  | 34208 | 4  | 48  | 8.21E-05 | 1.68E-03 | GO:0044212: transcription regulatory region DNA binding (MF)                                      |
| 1    | 34208 | 1  | 48  | 1.40E-03 | 7.67E-03 | GO:0004458: D-lactate dehydrogenase (cytochrome) activity (MF)                                    |
| 1    | 34208 | 1  | 48  | 1.40E-03 | 7.67E-03 | GO:0003721: telomeric template RNA reverse transcriptase activity (MF)                            |
| 1    | 34208 | 1  | 48  | 1.40E-03 | 7.67E-03 | GO:0003964: RNA-directed DNA polymerase activity (MF)                                             |
| 1    | 34208 | 1  | 48  | 1.40E-03 | 7.67E-03 | GO:0047277: globoside alpha-N-acetylgalactosaminyltransferase activity (MF)                       |
| 1    | 34208 | 1  | 48  | 1.40E-03 | 7.67E-03 | GO:0004380: glycoprotein-fucosylgalactoside alpha-N-acetylgalactosaminyltransferase activity (MF) |
| 1    | 34208 | 1  | 48  | 1.40E-03 | 7.67E-03 | GO:0004381: fucosylgalactoside 3-alpha-galactosyltransferase activity (MF)                        |
| 1    | 34208 | 1  | 48  | 1.40E-03 | 7.67E-03 | GO:00030548: acetylcholine receptor regulator activity (MF)                                       |
| 1    | 34208 | 1  | 48  | 1.40E-03 | 7.67E-03 | GO:0031208: POZ domain binding (MF)                                                               |
| 24   | 34208 | 2  | 48  | 5.22E-04 | 8.56E-03 | GO:0070491: repressing transcription factor binding (MF)                                          |
| NGR  | TNGR  | NG | TNG | Hyp      | Hyp*     | Annotations                                                                                       |
| 21   | 34208 | 3  | 48  | 3.39E-06 | 4.18E-04 | GO:0034644: cellular response to UV (BP)                                                          |
| 2    | 34208 | 2  | 48  | 1.93E-06 | 4.76E-04 | GO:0035565: regulation of pronephros size (BP)                                                    |
| 27   | 34208 | 3  | 48  | 7.41E-06 | 6.10E-04 | GO:0030073: insulin secretion (BP)                                                                |
| 578  | 34208 | 7  | 48  | 1.53E-05 | 9.46E-04 | GO:0045944: positive regulation of transcription from RNA polymerase II promoter (BP)             |
| 6    | 34208 | 2  | 48  | 2.88E-05 | 1.02E-03 | GO:0060261: positive regulation of transcription initiation from RNA polymerase II promoter (BP)  |
| 121  | 34208 | 4  | 48  | 2.57E-05 | 1.06E-03 | GO:0031018: endocrine pancreas development (BP)                                                   |
| 416  | 34208 | 6  | 48  | 2.49E-05 | 1.23E-03 | GO:0000122: negative regulation of transcription from RNA polymerase II promoter (BP)             |
| 468  | 34208 | 6  | 48  | 4.79E-05 | 1.48E-03 | GO:0045893: positive regulation of transcription, DNA-dependent (BP)                              |
| 12   | 34208 | 2  | 48  | 1.26E-04 | 3.46E-03 | GO:0030111: regulation of Wnt receptor signaling pathway (BP)                                     |
| 84   | 34208 | 3  | 48  | 2.28E-04 | 5.63E-03 | GO:0007389: pattern specification process (BP)                                                    |
| 20   | 34208 | 2  | 48  | 3.60E-04 | 8.09E-03 | GO:0001824: blastocyst development (BP)                                                           |
| 102  | 34208 | 3  | 48  | 4.04E-04 | 8.31E-03 | GO:0009887: organ morphogenesis (BP)                                                              |

Pathway enrichment analysis was performed for genes located within +/- 100 kb of each of the novel risk loci as well as for loci published previously by our PanScan and PanC4 GWAS. NGR: Number of annotated genes in the reference list; TNGR: total number of genes in the reference list; NG: number of annotated genes in the input list; TNG: Total number of genes in the input list; Hyp: hypergeometric *P*-value; Hyp\*: FDR corrected hypergeometric *P*-value. A corrected (Hyp\*) *P* value of 0.01 was used as a cutoff.

**Supplementary Table 9:** Expression QTL (eQTL) findings for novel pancreatic cancer risk loci. Genes in a 1MB region centered on the marker SNPs at each locus were assessed in GTEx pancreatic tissue samples.

| Chr1p36.33: eQTLs for rs13303010 |                    |            |                 |              |             |                |
|----------------------------------|--------------------|------------|-----------------|--------------|-------------|----------------|
| Gene Symbol                      | Gencode Id         | SNP        | P-value         | Effect Size* | T-Statistic | Standard Error |
| <b>KLHL17</b>                    | ENSG00000187961.9  | rs13303010 | <b>2.10E-05</b> | -0.42        | 4.4         | 0.094          |
| <b>NOCL2</b>                     | ENSG00000188976.6  | rs13303010 | <b>0.0010</b>   | 0.39         | -3.4        | 0.12           |
| <b>SAMD11</b>                    | ENSG00000187634.6  | rs13303010 | <b>0.02</b>     | -0.26        | 2.3         | 0.11           |
| <b>DVLI</b>                      | ENSG00000107404.13 | rs13303010 | <b>0.04</b>     | -0.14        | 2.1         | 0.07           |
| <i>ANKRD65</i>                   | ENSG00000235098.4  | rs13303010 | 0.05            | -0.35        | 2           | 0.18           |
| <i>PUSL1</i>                     | ENSG00000169972.7  | rs13303010 | 0.08            | 0.17         | -1.8        | 0.097          |
| <i>ATAD3C</i>                    | ENSG00000215915.5  | rs13303010 | 0.08            | -0.28        | 1.8         | 0.16           |
| <i>AGRN</i>                      | ENSG00000188157.9  | rs13303010 | 0.13            | 0.14         | -1.5        | 0.094          |
| <i>RNF223</i>                    | ENSG00000237330.2  | rs13303010 | 0.25            | -0.2         | 1.2         | 0.17           |
| <i>CCNL2</i>                     | ENSG00000221978.7  | rs13303010 | 0.26            | 0.087        | -1.1        | 0.077          |
| <i>ISG15</i>                     | ENSG00000187608.5  | rs13303010 | 0.34            | -0.15        | 0.95        | 0.15           |
| <i>VWAI</i>                      | ENSG00000179403.10 | rs13303010 | 0.38            | -0.1         | 0.88        | 0.12           |
| <i>TTL10</i>                     | ENSG00000162571.9  | rs13303010 | 0.40            | -0.14        | 0.85        | 0.16           |
| <i>C1orf159</i>                  | ENSG00000131591.13 | rs13303010 | 0.47            | -0.073       | 0.73        | 0.1            |
| <i>ACAP3</i>                     | ENSG00000131584.14 | rs13303010 | 0.48            | -0.061       | 0.7         | 0.086          |
| <i>PLEKHN1</i>                   | ENSG00000187583.6  | rs13303010 | 0.49            | -0.072       | 0.69        | 0.1            |
| <i>UBE2J2</i>                    | ENSG00000160087.16 | rs13303010 | 0.49            | 0.072        | -0.69       | 0.1            |
| <i>TAS1R3</i>                    | ENSG00000169962.4  | rs13303010 | 0.50            | -0.12        | 0.67        | 0.18           |
| <i>MIR429</i>                    | ENSG00000198976.1  | rs13303010 | 0.56            | -0.1         | 0.58        | 0.18           |
| <i>B3GALT6</i>                   | ENSG00000176022.3  | rs13303010 | 0.60            | 0.069        | -0.52       | 0.13           |
| <i>SCN1D</i>                     | ENSG00000162572.15 | rs13303010 | 0.65            | 0.054        | -0.45       | 0.12           |
| <i>MRPL20</i>                    | ENSG00000242485.1  | rs13303010 | 0.67            | -0.051       | 0.43        | 0.12           |
| <i>LINC00115</i>                 | ENSG00000225880.4  | rs13303010 | 0.79            | 0.038        | -0.27       | 0.14           |
| <i>TNFRSF18</i>                  | ENSG00000186891.9  | rs13303010 | 0.84            | 0.037        | -0.2        | 0.18           |
| <i>FAM87B</i>                    | ENSG00000177757.1  | rs13303010 | 0.85            | -0.038       | 0.19        | 0.2            |
| <i>AURKAP1</i>                   | ENSG00000175756.9  | rs13303010 | 0.89            | -0.014       | 0.13        | 0.1            |
| <i>HES4</i>                      | ENSG00000188290.6  | rs13303010 | 0.92            | -0.013       | 0.099       | 0.13           |
| <i>TNFRSF4</i>                   | ENSG00000186827.6  | rs13303010 | 0.95            | 0.011        | -0.064      | 0.16           |
| <i>MXRA8</i>                     | ENSG00000162576.12 | rs13303010 | 0.99            | -0.0012      | 0.011       | 0.11           |
| <i>SDF4</i>                      | ENSG00000078808.12 | rs13303010 | 1.00            | -0.00081     | 0.0056      | 0.14           |

Additional RefSeq genes in the 1MB region were either not found in GTEx or not sufficiently expressed. \*The direction of effect is listed for the risk increasing allele from the GWAS.

| Chr8q21.11: eQTLs for rs2941471 |                   |           |              |              |             |                |
|---------------------------------|-------------------|-----------|--------------|--------------|-------------|----------------|
| Gene Symbol                     | Gencode Id        | SNP       | P-value      | Effect Size* | T-Statistic | Standard Error |
| <b>HNFA4G</b>                   | ENSG00000164749.7 | rs2941471 | <b>0.038</b> | 0.15         | 2.1         | 0.073          |
| <i>CASC9</i>                    | ENSG00000249395.2 | rs2941471 | 0.88         | -0.018       | -0.16       | 0.12           |

Additional RefSeq genes in the 1MB region were either not found in GTEx or not sufficiently expressed. \*The direction of effect is listed for the risk increasing allele from the GWAS.

| Chr17q12: eQTLs for rs4795218 |                    |           |         |             |             |                |
|-------------------------------|--------------------|-----------|---------|-------------|-------------|----------------|
| Gene Symbol                   | Gencode Id         | SNP       | P-value | Effect Size | T-Statistic | Standard Error |
| <i>TBC1D3</i>                 | ENSG00000197681.8  | rs4795218 | 0.09    | 0.27        | 1.7         | 0.16           |
| <i>TADA2A</i>                 | ENSG00000108264.12 | rs4795218 | 0.22    | -0.17       | -1.2        | 0.14           |
| <i>SOC57</i>                  | ENSG00000174111.8  | rs4795218 | 0.36    | 0.081       | 0.91        | 0.089          |
| <i>MRPL45</i>                 | ENSG00000174100.5  | rs4795218 | 0.43    | -0.064      | -0.8        | 0.079          |
| <i>HNFB1B</i>                 | ENSG00000108753.8  | rs4795218 | 0.44    | 0.09        | 0.77        | 0.12           |
| <i>ACACA</i>                  | ENSG00000132142.15 | rs4795218 | 0.48    | -0.073      | -0.71       | 0.1            |
| <i>DUSP14</i>                 | ENSG00000161326.8  | rs4795218 | 0.50    | -0.072      | -0.67       | 0.11           |
| <i>SYNRG</i>                  | ENSG00000006114.11 | rs4795218 | 0.57    | -0.084      | -0.57       | 0.15           |
| <i>GPR179</i>                 | ENSG00000188888.7  | rs4795218 | 0.60    | 0.079       | 0.52        | 0.15           |
| <i>TBC1D3H</i>                | ENSG00000242384.3  | rs4795218 | 0.64    | -0.079      | -0.47       | 0.17           |
| <i>TBC1D3F</i>                | ENSG00000185128.11 | rs4795218 | 0.66    | -0.069      | -0.44       | 0.16           |
| <i>DDX52</i>                  | ENSG00000141141.10 | rs4795218 | 0.78    | 0.035       | 0.28        | 0.12           |
| <i>TBC1D3C</i>                | ENSG00000234972.4  | rs4795218 | 0.99    | -0.0028     | -0.017      | 0.17           |

Additional RefSeq genes in the 1MB region were either not found in GTEx or not sufficiently expressed.

| chr18q21.32: eQTLs for rs1517037 |                   |           |         |             |             |                |
|----------------------------------|-------------------|-----------|---------|-------------|-------------|----------------|
| Gene Symbol                      | Gencode Id        | SNP       | P-value | Effect Size | T-Statistic | Standard Error |
| <i>CCBE1</i>                     | ENSG00000183287.9 | rs1517037 | 0.59    | -0.061      | -0.55       | 0.11           |
| <i>GRP</i>                       | ENSG00000134443.5 | rs1517037 | 0.82    | -0.034      | -0.22       | 0.15           |
| <i>LMAN1</i>                     | ENSG00000074695.5 | rs1517037 | 0.96    | -0.002      | -0.044      | 0.045          |
| <i>MALT1</i>                     | ENSG00000172175.8 | rs1517037 | 0.2     | -0.15       | -1.3        | 0.11           |
| <i>SEC11C</i>                    | ENSG00000166562.4 | rs1517037 | 0.94    | -0.0043     | -0.074      | 0.058          |
| <i>ZNF532</i>                    | ENSG00000074657.9 | rs1517037 | 0.18    | -0.14       | -1.4        | 0.1            |

Additional RefSeq genes in the 1MB region were either not found in GTEx or not sufficiently expressed.

| Chr7p12.3: eQTLs for rs73328514 |                    |            |         |             |             |                |
|---------------------------------|--------------------|------------|---------|-------------|-------------|----------------|
| Gene Symbol                     | Gencode Id         | SNP        | P-value | Effect Size | T-Statistic | Standard Error |
| <i>TNS3</i>                     | ENSG00000136205.12 | rs73328514 | 0.34    | 0.095       | 0.95        | 0.099          |

Additional RefSeq genes in the 1MB region were either not found in GTEx or not sufficiently expressed.



|   |         |      |      |          |   |   |      |      |      |      |  |  |  |      |                  |  |                  |                |
|---|---------|------|------|----------|---|---|------|------|------|------|--|--|--|------|------------------|--|------------------|----------------|
| 8 | 7853491 | 0.71 | 0.89 | 16241443 | C | A | 0.84 | 0.46 | 0.4  | 0.61 |  |  |  |      | Nrc3,Nkx2,Nkx3   |  |                  | 3103.5 of GDFP |
| 8 | 7853534 | 0.71 | 0.89 | 16257780 | A | G | 0.88 | 0.46 | 0.41 | 0.61 |  |  |  |      | 7 altered motifs |  |                  | 3103.5 of GDFP |
| 8 | 7853586 | 0.71 | 0.89 | 16261149 | G | A | 0.88 | 0.46 | 0.4  | 0.61 |  |  |  |      | Nkx3,Psalm1      |  |                  | 3103.5 of GDFP |
| 8 | 7853644 | 0.71 | 0.89 | 16263509 | A | C | 0.8  | 0.46 | 0.4  | 0.6  |  |  |  | ENSR |                  |  | 7 altered motifs | 3103.5 of GDFP |
| 8 | 7853795 | 0.71 | 0.89 | 16264121 | C | C | 0.88 | 0.46 | 0.4  | 0.61 |  |  |  |      |                  |  |                  | 3103.5 of GDFP |
| 8 | 7853797 | 0.71 | 0.89 | 16264121 | A | G | 0.88 | 0.46 | 0.4  | 0.61 |  |  |  |      | Nkx2,Nkx3        |  |                  | 3103.5 of GDFP |
| 8 | 7853840 | 0.70 | 0.89 | 16271370 | A | T | 0.88 | 0.46 | 0.4  | 0.61 |  |  |  |      | GATA3            |  |                  | 3103.5 of GDFP |

The numeric values in parentheses were calculated for diverging sites in protein structure. The resulting scores used change scores (CS) - Equations (5) as provided by SIFT to be interpreted. Rank 0 and 10 are "highly conserved/less likely altered" amino acids.

|                          |         |      |      |            |   |   |      |      |      |      |               |          |                |                   |               |  |                  |                  |         |         |
|--------------------------|---------|------|------|------------|---|---|------|------|------|------|---------------|----------|----------------|-------------------|---------------|--|------------------|------------------|---------|---------|
| <b>hMh132: rsl399918</b> |         |      |      |            |   |   |      |      |      |      |               |          |                |                   |               |  |                  |                  |         |         |
| 17                       | 5607499 | 0.77 | 0.98 | 111424921  | G | A | 0.06 | 0.13 | 0.14 | 0.21 | 1NG           | 5 sites  | ENSR,IPSC,1,NG | PH2,GATA3         |               |  | 7 altered motifs | INSTR            | intense |         |
| 17                       | 5607799 | 1.00 | 1.00 | 14118169   | G | A | 0.04 | 0.23 | 0.32 | 0.22 | 7 sites       | 14 sites | 9 sites        | FNXAL,FXNA5,TCF4  |               |  | 8 altered motifs | INSTR            | intense |         |
| 17                       | 5607799 | 1.00 | 1.00 | 16119999   | C | T | 0.08 | 0.23 | 0.32 | 0.22 | 6 sites       | 13 sites | 72 sites       | 16 altered motifs | CTCF,PU1,SDF1 |  |                  | 7 altered motifs | INSTR   | intense |
| 17                       | 5607961 | 0.97 | 1.00 | 141264144  | A | C | 0.09 | 0.21 | 0.34 | 0.23 | JAY,STRM,1,NG | 14 sites | MNS            |                   |               |  | 4f               | INSTR            | intense |         |
| 17                       | 5608538 | 1.00 | 1.00 | 14128270   | G | A | 0.08 | 0.23 | 0.31 | 0.23 | 9 sites       | 4 sites  | ENSR,G1,ENSR   |                   |               |  | 1 NR,YY1         | INSTR            | intense |         |
| 17                       | 5607961 | 0.97 | 1.00 | 141264144  | G | A | 0.07 | 0.16 | 0.32 | 0.21 | 11 sites      | 4 sites  | IPSC           |                   |               |  | 4 altered motifs | INSTR            | intense |         |
| 17                       | 5608165 | 0.70 | 1.00 | 1412138469 | G | C | 0.02 | 0.16 | 0.32 | 0.19 | 4 sites       | 4 sites  | IPSC           | ZNF263            |               |  | 7 altered motifs | INSTR            | intense |         |
| 17                       | 5608207 | 0.76 | 0.94 | 141455811  | A | C | 0.03 | 0.16 | 0.32 | 0.22 | ENSR,G1,PAN3  |          |                |                   |               |  | ZBTB24           | INSTR            | intense |         |

|                          |         |      |      |           |   |    |      |      |      |      |  |  |               |      |  |  |                |  |                  |                   |              |
|--------------------------|---------|------|------|-----------|---|----|------|------|------|------|--|--|---------------|------|--|--|----------------|--|------------------|-------------------|--------------|
| <b>hMh132: rsl399927</b> |         |      |      |           |   |    |      |      |      |      |  |  |               |      |  |  |                |  |                  |                   |              |
| 18                       | 5687628 | 0.87 | 0.98 | 142624144 | G | A  | 0.13 | 0.22 | 0.17 | 0.18 |  |  | ENSR,BS1,SKN1 | BS1  |  |  | GR,NBP1,YY1    |  | 110.5 of GDFP    |                   |              |
| 18                       | 5687629 | 0.88 | 1.00 | 142624144 | G | T  | 0.13 | 0.22 | 0.17 | 0.18 |  |  | ENSR,BS1,SKN1 |      |  |  | Hmg1,Mef2      |  | 110.5 of GDFP    |                   |              |
| 18                       | 5687661 | 0.88 | 1.00 | 142624144 | A | G  | 0.27 | 0.25 | 0.17 | 0.18 |  |  | ENSR,BS1,SKN1 |      |  |  | Pax5,2,Sp100   |  | 110.5 of GDFP    |                   |              |
| 18                       | 5687682 | 0.88 | 1.00 | 142624144 | T | C  | 0.13 | 0.22 | 0.17 | 0.18 |  |  | ENSR,BS1      |      |  |  |                |  | 110.5 of GDFP    |                   |              |
| 18                       | 5687717 | 0.88 | 1.00 | 142624144 | G | A  | 0.13 | 0.22 | 0.17 | 0.18 |  |  | ENSR,BS1      |      |  |  | GATA3          |  | 100.5 of GDFP    |                   |              |
| 18                       | 5687729 | 0.88 | 1.00 | 142624144 | T | G  | 0.13 | 0.22 | 0.17 | 0.17 |  |  | ENSR,BS1      |      |  |  | GATA,Pu-1      |  | 100.5 of GDFP    |                   |              |
| 18                       | 5687727 | 0.88 | 1.00 | 142624144 | C | T  | 0.13 | 0.22 | 0.17 | 0.18 |  |  | ENSR,BS1      | IPSC |  |  |                |  | 90.5 of GDFP     |                   |              |
| 18                       | 5687793 | 0.88 | 1.00 | 142624144 | C | T  | 0.13 | 0.22 | 0.17 | 0.18 |  |  | ENSR,BS1      |      |  |  | Mx1,PPAR       |  | 90.5 of GDFP     |                   |              |
| 18                       | 5687897 | 0.88 | 1.00 | 142624144 | A | AG | 0.14 | 0.22 | 0.17 | 0.18 |  |  | ENSR,BS1      |      |  |  |                |  | 4 altered motifs | 90.5 of GDFP      |              |
| 18                       | 5687899 | 0.88 | 1.00 | 142624144 | G | A  | 0.13 | 0.22 | 0.17 | 0.18 |  |  | ENSR,BS1      |      |  |  |                |  | 7 altered motifs | 90.5 of GDFP      |              |
| 18                       | 5687810 | 0.88 | 1.00 | 142624144 | C | T  | 0.25 | 0.22 | 0.17 | 0.18 |  |  |               |      |  |  | SRE,YY1,ZBTB24 |  | 90.5 of GDFP     |                   |              |
| 18                       | 5687824 | 1.00 | 1.00 | 142624144 | C | T  | 0.26 | 0.22 | 0.17 | 0.18 |  |  |               |      |  |  |                |  |                  | 90.5 of GDFP      |              |
| 18                       | 5687862 | 0.88 | 1.00 | 142624144 | G | A  | 0.16 | 0.22 | 0.17 | 0.18 |  |  |               |      |  |  |                |  | 7 altered motifs | 90.5 of GDFP      |              |
| 18                       | 5687884 | 0.98 | 1.00 | 142624144 | A | G  | 0.29 | 0.25 | 0.17 | 0.19 |  |  |               |      |  |  |                |  | 8 altered motifs | 90.5 of GDFP      |              |
| 18                       | 5687941 | 0.98 | 1.00 | 142624144 | A | G  | 0.29 | 0.25 | 0.17 | 0.19 |  |  |               |      |  |  |                |  | 8 altered motifs | 90.5 of GDFP      |              |
| 18                       | 5687948 | 0.98 | 1.00 | 142624144 | T | C  | 0.3  | 0.25 | 0.17 | 0.19 |  |  |               |      |  |  |                |  | PRAB,SEF-1       | 90.5 of GDFP      |              |
| 18                       | 5687983 | 0.98 | 1.00 | 142624144 | T | C  | 0.3  | 0.25 | 0.17 | 0.19 |  |  |               |      |  |  |                |  | Pax5,TFE         | 90.5 of GDFP      |              |
| 18                       | 5687987 | 0.90 | 0.98 | 142624144 | T | C  | 0.34 | 0.22 | 0.17 | 0.2  |  |  | ESC           |      |  |  |                |  | 4f               | 70.5 of GDFP      |              |
| 18                       | 5888111 | 0.98 | 0.99 | 142624144 | G | A  | 0.15 | 0.26 | 0.17 | 0.2  |  |  |               |      |  |  |                |  | Stat3,Relb       | 70.5 of GDFP      |              |
| 18                       | 5888113 | 0.98 | 0.99 | 142624144 | C | A  | 0.15 | 0.26 | 0.17 | 0.2  |  |  |               |      |  |  |                |  | Relb             | 70.5 of GDFP      |              |
| 18                       | 5888177 | 0.88 | 0.99 | 142624144 | T | C  | 0.34 | 0.24 | 0.17 | 0.19 |  |  | BEN           |      |  |  |                |  | 7 altered motifs | 70.5 of GDFP      |              |
| 18                       | 5888319 | 0.88 | 0.99 | 142624144 | T | G  | 0.32 | 0.24 | 0.17 | 0.19 |  |  | BEN           | PAN3 |  |  |                |  |                  | 7 altered motifs  | 70.5 of GDFP |
| 18                       | 5888320 | 0.88 | 0.99 | 142624144 | T | G  | 0.32 | 0.24 | 0.17 | 0.19 |  |  |               |      |  |  |                |  |                  | 10 altered motifs | 70.5 of GDFP |

Rank 0 on SIFT and 10000 data was used for this analysis. The most significant variant at each rank locus is highlighted in a light yellow color.

**Supplementary Table 11.** Change in probability of transcription factor binding site (TFBS) motif presence due to allelic changes at SNPs at the 1p36.33 risk locus.

| SNP Name     | Transcription Factor Motif       | P-value 1 | P-value 2 | Fold Change in P-value | up/down | Database     |
|--------------|----------------------------------|-----------|-----------|------------------------|---------|--------------|
| rs13303160   | SMARCC1                          | 1.1E-06   | 2.1E-04   | 197                    | down    | HOCOMOCO     |
| rs13303160   | FOSL1                            | 1.3E-06   | 2.6E-04   | 196                    | down    | JASPAR       |
| rs13303160   | JUND                             | 1.7E-05   | 1.6E-03   | 94                     | down    | HOCOMOCO     |
| rs13303160   | BACH2                            | 3.3E-06   | 3.0E-04   | 89                     | down    | SwissRegulon |
| rs13303160   | BATF                             | 3.4E-05   | 2.9E-03   | 86                     | down    | HOCOMOCO     |
| rs13303160   | FOSL2                            | 7.1E-06   | 5.3E-04   | 74                     | down    | JASPAR       |
| rs13303160   | JUNB                             | 5.6E-06   | 3.8E-04   | 67                     | down    | JASPAR       |
| rs13303327   | PURA                             | 9.2E-05   | 1.5E-06   | 63                     | up      | HOCOMOCO     |
| rs13303160   | FOSB                             | 7.5E-06   | 3.6E-04   | 48                     | down    | HOCOMOCO     |
| rs13303160   | PAX5                             | 2.2E-04   | 1.0E-02   | 47                     | down    | HOCOMOCO     |
| rs13303160   | FOS                              | 1.2E-05   | 5.1E-04   | 43                     | down    | HOCOMOCO     |
| rs13303160   | FOS, FOSB, FOSL1, JUNB, and JUND | 2.2E-05   | 8.9E-04   | 41                     | down    | SwissRegulon |
| rs10465242   | GCM1                             | 9.9E-03   | 2.4E-04   | 41                     | up      | HT-SELEX     |
| rs111748052* | BRCA1                            | 2.1E-02   | 8.7E-01   | 41                     | down    | JASPAR       |
| rs7524174    | PAX2                             | 6.1E-05   | 2.4E-03   | 39                     | down    | HOCOMOCO     |
| rs3935066    | MZFI                             | 1.1E-04   | 4.1E-03   | 38                     | down    | JASPAR       |
| rs7524174    | MAFG and NEF2L1                  | 2.4E-04   | 9.2E-03   | 38                     | down    | JASPAR       |
| rs111748052* | OCT1                             | 5.0E-01   | 1.3E-02   | 37                     | up      | TRANSFAC     |
| rs13303160   | JUN                              | 3.5E-05   | 1.3E-03   | 37                     | down    | HOMER        |
| rs4970445    | HINFP                            | 8.8E-05   | 3.1E-03   | 35                     | down    | HT-SELEX     |
| rs13303327   | SPI1                             | 1.0E-04   | 3.4E-03   | 34                     | down    | JASPAR       |
| rs10465242   | HLTF                             | 8.3E-05   | 2.7E-03   | 32                     | down    | HOCOMOCO     |
| rs4970445    | PURA                             | 1.9E-05   | 6.2E-04   | 32                     | down    | HOCOMOCO     |
| rs13303160   | JUNB                             | 7.1E-06   | 2.2E-04   | 31                     | down    | HOCOMOCO     |
| rs4970445    | TCF4                             | 1.4E-02   | 4.6E-04   | 30                     | up      | HT-SELEX     |
| rs7524174    | THAP1                            | 1.1E-03   | 3.8E-05   | 29                     | up      | HOCOMOCO     |
| rs13303160   | JUND                             | 2.4E-05   | 6.8E-04   | 28                     | down    | JASPAR       |
| rs4970445    | KLF15                            | 8.7E-05   | 3.2E-06   | 28                     | up      | HOCOMOCO     |
| rs7524174    | NFE2L1                           | 3.5E-04   | 9.2E-03   | 27                     | down    | SwissRegulon |
| rs13303160   | JUN                              | 7.6E-05   | 2.0E-03   | 26                     | down    | JASPAR       |
| rs13303010   | GFI1B                            | 4.9E-05   | 1.3E-03   | 26                     | down    | SwissRegulon |
| rs13303160   | JUN                              | 1.3E-05   | 3.4E-04   | 26                     | down    | HOCOMOCO     |
| rs13303327   | YY1                              | 5.9E-06   | 1.5E-04   | 25                     | down    | HOCOMOCO     |
| rs13303160   | FOS                              | 5.9E-05   | 1.5E-03   | 25                     | down    | JASPAR       |
| rs3935066    | TBX1                             | 1.8E-04   | 4.5E-03   | 25                     | down    | HT-SELEX     |
| rs13303327   | EHF                              | 1.1E-05   | 2.7E-04   | 24                     | down    | HOCOMOCO     |
| rs7524174    | NFE2L2                           | 1.7E-04   | 3.9E-03   | 24                     | down    | JASPAR       |
| rs13303160   | FOSL2                            | 1.6E-05   | 3.6E-04   | 23                     | down    | SwissRegulon |
| rs4970445    | ZNF354C                          | 7.9E-03   | 3.5E-04   | 23                     | up      | JASPAR       |
| rs13303160   | BATF and JUN                     | 1.7E-04   | 3.9E-03   | 23                     | down    | JASPAR       |
| rs13303160   | NFE2                             | 5.4E-05   | 1.2E-03   | 22                     | down    | SwissRegulon |
| rs13303327   | TEAD1                            | 3.8E-04   | 8.2E-03   | 22                     | down    | HOCOMOCO     |
| rs4970445    | PKNOX2                           | 5.0E-03   | 2.3E-04   | 22                     | up      | HOCOMOCO     |
| rs13303160   | FOSL1                            | 2.7E-05   | 5.6E-04   | 21                     | down    | HOCOMOCO     |
| rs13303327   | ELF1                             | 1.4E-04   | 2.9E-03   | 21                     | down    | JASPAR       |
| rs4970445    | HINFP                            | 1.0E-04   | 2.1E-03   | 20                     | down    | JASPAR       |
| rs4970445    | ELF2                             | 1.1E-04   | 2.2E-03   | 20                     | down    | HOCOMOCO     |
| rs3935066    | ZNF219                           | 1.5E-04   | 2.8E-03   | 19                     | down    | HOCOMOCO     |
| rs3935066    | TBX2                             | 1.4E-04   | 2.7E-03   | 19                     | down    | HT-SELEX     |
| rs4970445    | HINFP                            | 9.6E-05   | 1.8E-03   | 19                     | down    | HOCOMOCO     |
| rs3935066    | GSC2                             | 3.4E-04   | 6.1E-03   | 18                     | down    | HOCOMOCO     |
| rs7524174    | ESRRA                            | 3.6E-04   | 6.4E-03   | 18                     | down    | HT-SELEX     |
| rs3935066    | ZEB1                             | 4.9E-03   | 2.9E-04   | 17                     | up      | JASPAR       |
| rs4970445    | EN1 and EN2                      | 7.1E-03   | 4.2E-04   | 17                     | up      | SwissRegulon |
| rs13303160   | FOSL2                            | 2.2E-05   | 3.6E-04   | 16                     | down    | HOCOMOCO     |
| rs10465242   | ASCL2                            | 4.3E-03   | 2.7E-04   | 16                     | up      | HOCOMOCO     |
| rs3935066    | SREBF1                           | 3.6E-04   | 5.5E-03   | 15                     | down    | HOMER        |
| rs10465242   | NKX2-8                           | 4.6E-04   | 7.0E-03   | 15                     | down    | HOCOMOCO     |
| rs3935066    | ZNF148                           | 1.6E-04   | 2.5E-03   | 15                     | down    | HOCOMOCO     |
| rs13303327   | ZNF143                           | 7.4E-03   | 4.8E-04   | 15                     | up      | HOMER        |
| rs13303327   | ATO1H1                           | 4.0E-04   | 6.0E-03   | 15                     | down    | JASPAR       |
| rs7524174    | SREBF2                           | 2.8E-04   | 4.1E-03   | 15                     | down    | JASPAR       |
| rs4970445    | ZIC2                             | 2.5E-03   | 1.7E-04   | 15                     | up      | HOCOMOCO     |
| rs13303160   | NFE2L2                           | 1.6E-05   | 2.3E-04   | 15                     | down    | SwissRegulon |
| rs7524174    | NFE2                             | 2.2E-04   | 3.2E-03   | 15                     | down    | HOCOMOCO     |
| rs7524174    | ESRRG                            | 8.3E-05   | 1.2E-03   | 15                     | down    | HT-SELEX     |

Probability 1 and Probability 2 correspond to the probability of the given TFBS motif with allele 1 or allele 2 of the specified SNP using PERFECTOS-APE analysis. The fold change represents the change in P-value for the TFBS motif.

\* The probability and fold change were calculated by sTRAP (see Methods). Note that another indel, rs113491766, was also assessed by sTRAP but no differences above a fold change score of 15 were noted.

**Supplementary Table 12.** Differential gene expression in pancreatic tumors and histologically normal pancreatic tissue samples. Expression was assessed by mRNA-seq and compared in pancreatic tumors vs. histologically normal pancreatic tissue samples (TvN) and in pancreatic cell lines vs. histologically normal pancreatic tissue samples (CvN) for genes closest to reported variants on chromosomes 1p36.33 (*KLHL17*, *NOC2L*, *PLEKHN1*, *SAMD11* and *DVLI*), 8q21.11 (*HNF4G*), 17q12 (*HNF1B*) and 18q21.32 (*GRP*).

| Gene Name                                                                                                 | <i>KLHL17</i> | <i>NOC2L</i> | <i>PLEKHN1</i> | <i>SAMD11</i> | <i>DVLI</i> | <i>TNS3</i> | <i>HNF4G</i> | <i>HNF1B</i> | <i>GRP</i> |
|-----------------------------------------------------------------------------------------------------------|---------------|--------------|----------------|---------------|-------------|-------------|--------------|--------------|------------|
| <b>Entrez ID</b>                                                                                          | 339451        | 26155        | 84069          | 148398        | 1855        | 64759       | 3174         | 6928         | 2922       |
| Normal 1                                                                                                  | 225.97        | 3660.06      | 28.71          | 587.03        | 4156.10     | 17699.93    | 1571.47      | 6237.08      | 356.51     |
| Normal 2                                                                                                  | 273.89        | 4658.32      | 28.49          | 528.51        | 7315.98     | 22237.89    | 1743.46      | 4543.77      | 18.97      |
| Normal 3                                                                                                  | 210.79        | 5909.00      | 22.12          | 871.09        | 7378.60     | 12606.85    | 1802.53      | 2803.25      | 1.16       |
| Normal 4                                                                                                  | 563.04        | 5229.28      | 28.05          | 345.66        | 9502.26     | 21113.19    | 1978.71      | 4057.02      | 33.03      |
| Normal 5                                                                                                  | 665.38        | 5353.50      | 26.48          | 206.24        | 10426.15    | 20124.43    | 1779.38      | 4293.38      | 10.14      |
| Normal 6                                                                                                  | 915.91        | 5619.71      | 15.32          | 503.41        | 11117.67    | 22451.52    | 1367.77      | 7814.49      | 41.28      |
| Normal 7                                                                                                  | 611.70        | 5172.29      | 156.63         | 1003.60       | 11257.82    | 26456.71    | 1402.82      | 7324.82      | 24.28      |
| Normal 8                                                                                                  | 640.49        | 5030.28      | 36.14          | 745.72        | 11857.35    | 13787.15    | 549.33       | 1459.15      | 33.47      |
| Normal 9                                                                                                  | 775.77        | 4815.84      | 0.10           | 632.31        | 10897.38    | 17744.63    | 1550.60      | 5904.95      | 66.12      |
| Normal 10                                                                                                 | 322.31        | 5198.63      | 17.95          | 453.26        | 8587.31     | 17252.56    | 2044.12      | 2995.59      | 180.59     |
| Tumor 1                                                                                                   | 583.56        | 6081.74      | 639.80         | 987.91        | 8825.92     | 11187.18    | 187.22       | 126.76       | 176.22     |
| Tumor 2                                                                                                   | 227.66        | 2735.56      | 446.21         | 965.18        | 3073.61     | 14834.16    | 757.05       | 2662.97      | 287.69     |
| Tumor 3                                                                                                   | 449.99        | 5622.10      | 623.81         | 564.39        | 3706.07     | 11838.02    | 1194.45      | 1023.96      | 362.12     |
| Tumor 4                                                                                                   | 191.12        | 3964.56      | 120.28         | 1661.55       | 3529.93     | 10236.65    | 655.85       | 1347.16      | 545.46     |
| Tumor 5                                                                                                   | 255.93        | 3611.40      | 128.60         | 1152.09       | 3647.30     | 19646.41    | 840.59       | 1676.55      | 236.45     |
| Tumor 6                                                                                                   | 296.33        | 2934.45      | 260.18         | 1068.44       | 3666.85     | 17518.22    | 1384.42      | 1639.57      | 230.18     |
| Tumor 7                                                                                                   | 159.31        | 2256.26      | 111.42         | 471.82        | 1767.52     | 13104.24    | 739.50       | 1392.81      | 150.64     |
| Tumor 8                                                                                                   | 415.46        | 3262.21      | 334.37         | 678.51        | 3231.22     | 16676.89    | 989.86       | 2412.82      | 58.16      |
| PANC-1                                                                                                    | 1895.65       | 21385.42     | 1112.92        | 3537.45       | 17241.69    | 55621.16    | 17.46        | 0.30         | 0.00       |
| AsPC-1                                                                                                    | 375.03        | 8200.25      | 430.40         | 399.51        | 6118.31     | 8344.57     | 1763.78      | 0.12         | 0.00       |
| BxPC-3                                                                                                    | 504.65        | 11016.30     | 664.76         | 472.14        | 5255.31     | 6447.52     | 305.91       | 2.50         | 0.00       |
| CFPAC-1                                                                                                   | 718.15        | 11265.71     | 857.47         | 344.86        | 7538.27     | 11589.33    | 459.19       | 3033.01      | 0.00       |
| SU8686                                                                                                    | 1202.52       | 16523.64     | 1143.64        | 584.81        | 11208.20    | 16336.15    | 345.72       | 547.98       | 0.00       |
| MIAPaCa-2                                                                                                 | 805.96        | 22802.91     | 211.13         | 930.75        | 4925.21     | 21485.32    | 0.02         | 0.02         | 0.00       |
| SW1990                                                                                                    | 1051.25       | 10028.07     | 1329.39        | 362.49        | 14119.23    | 11008.89    | 10.01        | 0.10         | 0.00       |
| CAPAN-1                                                                                                   | 508.93        | 10711.86     | 430.83         | 433.39        | 4583.40     | 15843.78    | 190.49       | 1160.60      | 0.00       |
| Hs766T                                                                                                    | 437.08        | 10898.64     | 59.27          | 356.77        | 5662.38     | 32046.28    | 0.00         | 9.08         | 0.00       |
| Differential expression in pancreatic tumor samples as compared to histologically normal samples (TvN)    |               |              |                |               |             |             |              |              |            |
| logCPM                                                                                                    | 1.64          | 5.02         | 0.28           | 2.43          | 5.64        | 6.94        | 3.18         | 4.58         | 0.18       |
| SignedFC                                                                                                  | -1.72         | -1.32        | 7.72           | 1.60          | -2.47       | -1.39       | -1.79        | -3.29        | 3.35       |
| P-Value                                                                                                   | 0.105         | 0.083        | 1.81E-07       | 0.053         | 2.10E-05    | 0.110       | 0.005        | 5.54E-06     | 0.007      |
| Differential expression in pancreatic tumor cell lines as compared to histologically normal samples (CvN) |               |              |                |               |             |             |              |              |            |
| logCPM                                                                                                    | 2.67          | 6.50         | 1.91           | 2.72          | 6.33        | 7.47        | 2.99         | 4.40         | NA         |
| SignedFC                                                                                                  | 2.06          | 3.98         | 21.50          | 1.86          | 1.25        | 1.41        | -3.32        | -6.33        | NA         |
| P-Value                                                                                                   | 0.010         | 9.69E-10     | 3.98E-11       | 0.040         | 0.186       | 0.096       | 0.036        | 0.009        | NA         |

Gene expression values are listed as adjusted counts per million (CPM) as per analysis in EdgeR. Normal samples were histologically normal tumor adjacent tissue samples. Signed fold changes were calculated in EdgeR. Tumor cellularity for tumor samples ranged from 60-90%. Data was generated as part of Hoskins et al. (2014) Carcinogenesis (PMID:25233928)<sup>50</sup>.



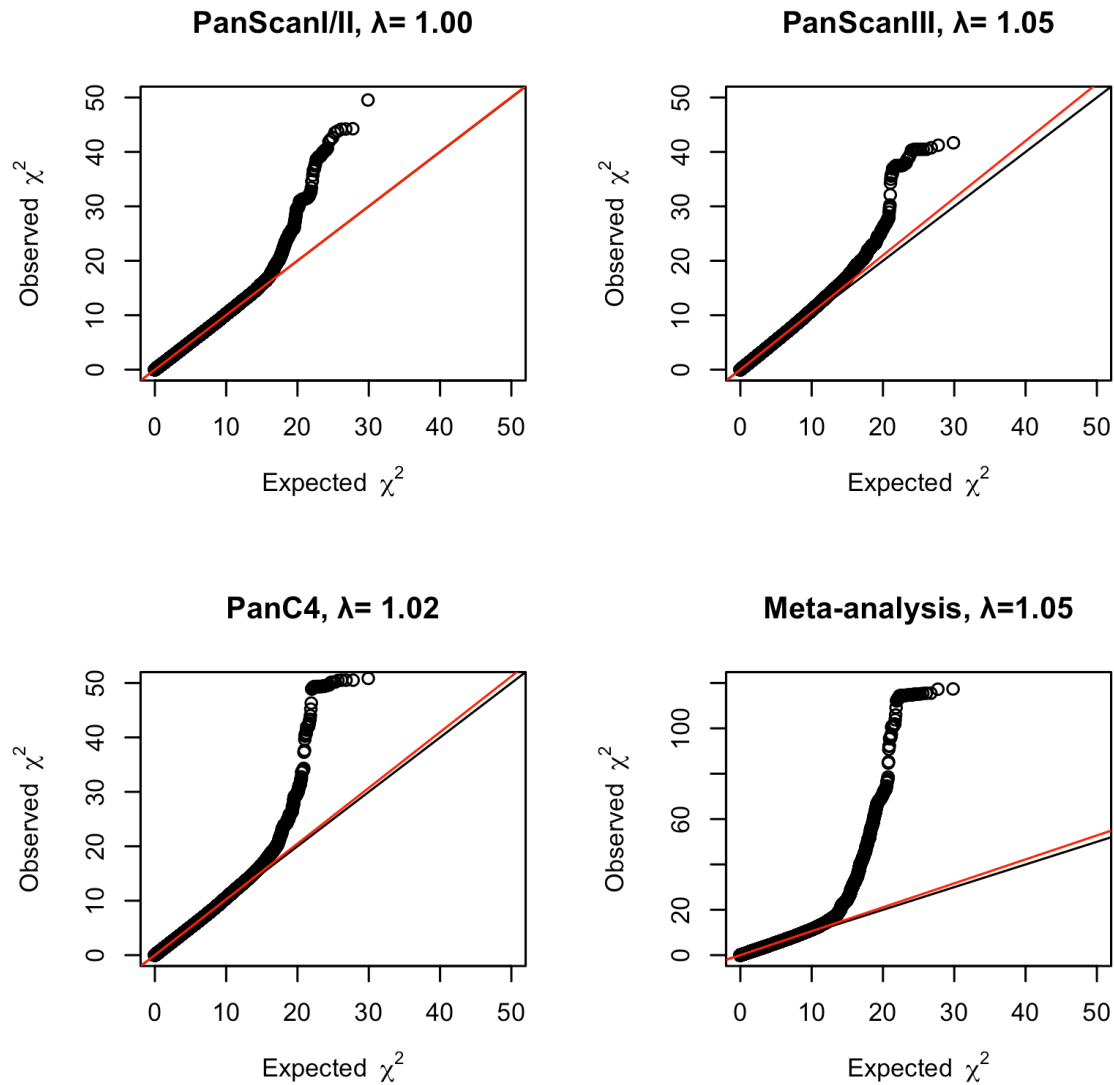

**Supplementary Figure 1.** Quantile-quantile (Q-Q) plot of the association results in PanScan I+II (top left panel), PanScan III (top right panel), PanC4 (bottom left panel) and the meta-analysis of all three datasets (bottom right panel).

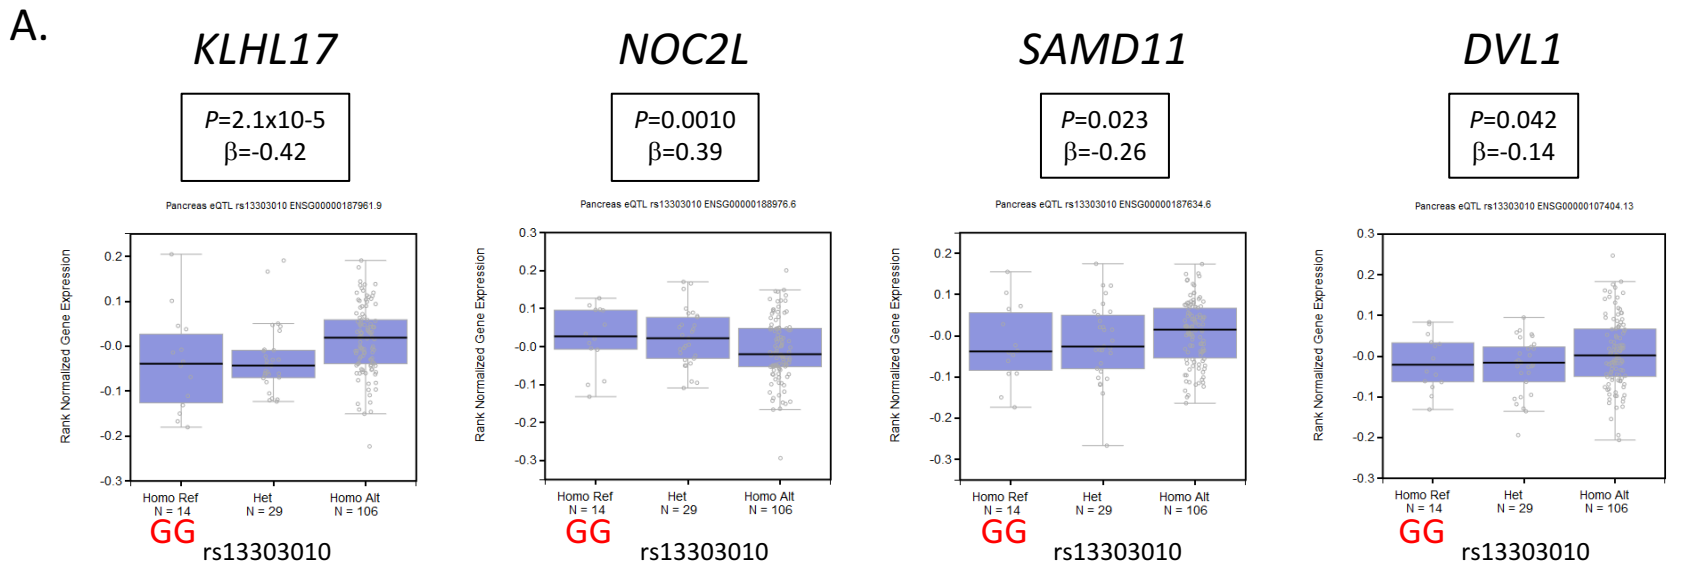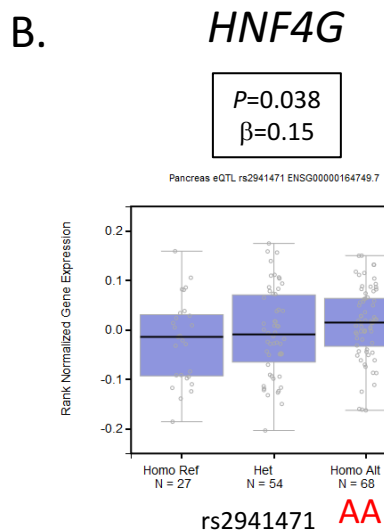

**Supplementary Figure 2:** Expression quantitative trait loci (eQTLs) for marker SNPs on chromosomes 1p36.33 (A.) and 8q21.11 (B.) in histologically normal pancreatic tissue samples from GTex (n=149). Expression QTLs were tested for the five GWAS significant risk loci. Nominally significant eQTLs are shown here. These were attempted for replication in the LTG and TCGA eQTL sample sets (Table 2 and Figure 2). Pancreatic cancer risk increasing alleles are indicated in red. The eQTL effect size is indicated for the GWAS risk increasing allele.
